# Supplementary material for: Interactions of Schiff-base ligands with gold nanoparticles: structural, optical and electrocatalytic studies
Source: Royal Society of Chemistry journal article supplement (doi:10.1039/c0cp02164d), 2011-01-01
Supplement: c0cp02164d.pdf [file c0cp02164d.pdf]

## Supplementary information

### Interactions of Schiff-Base Ligands with Gold Nanoparticles: Structural, Optical and Electrocatalytic Studies

Jose María Abad,<sup>\*a</sup> Mónica Revenga-Parra, Tania García, Miriam Gamero, Encarnación Lorenzo and Félix Pariente

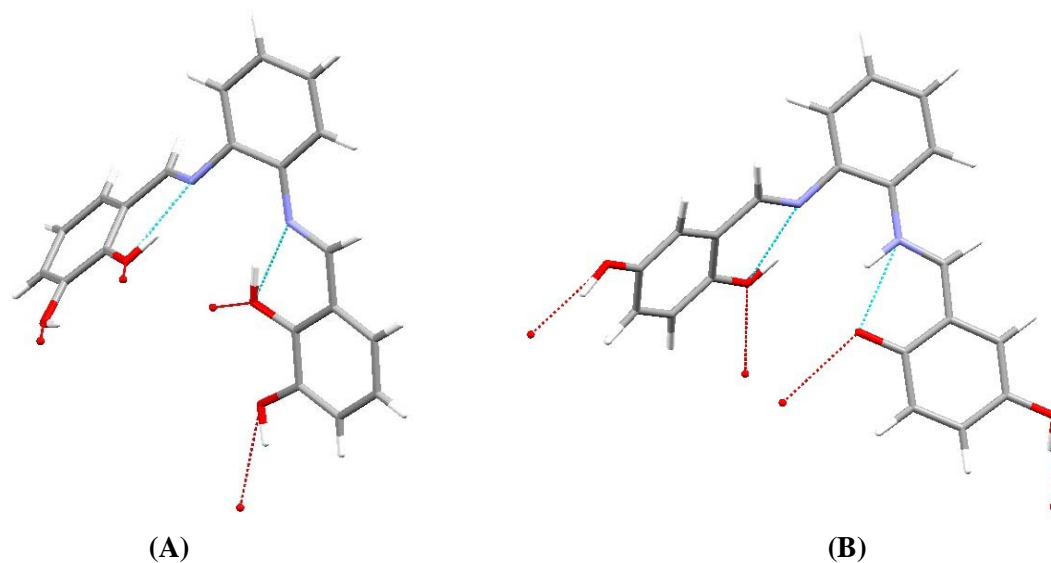

**Fig. S1** Crystallographic structures of the dihydroxysalophen isomers (A) 2,3-DHS; (B) 2,5-DHS obtained from the Cambridge Crystallographic Database (CDC) using MIJWUY, VEFTEG as entries, respectively. Blue and red sticks correspond to nitrogen and oxygen atoms, and dash lines indicate H-bonds. Mercury 2.3 and POV-Ray 3.6 software were used for visualization.

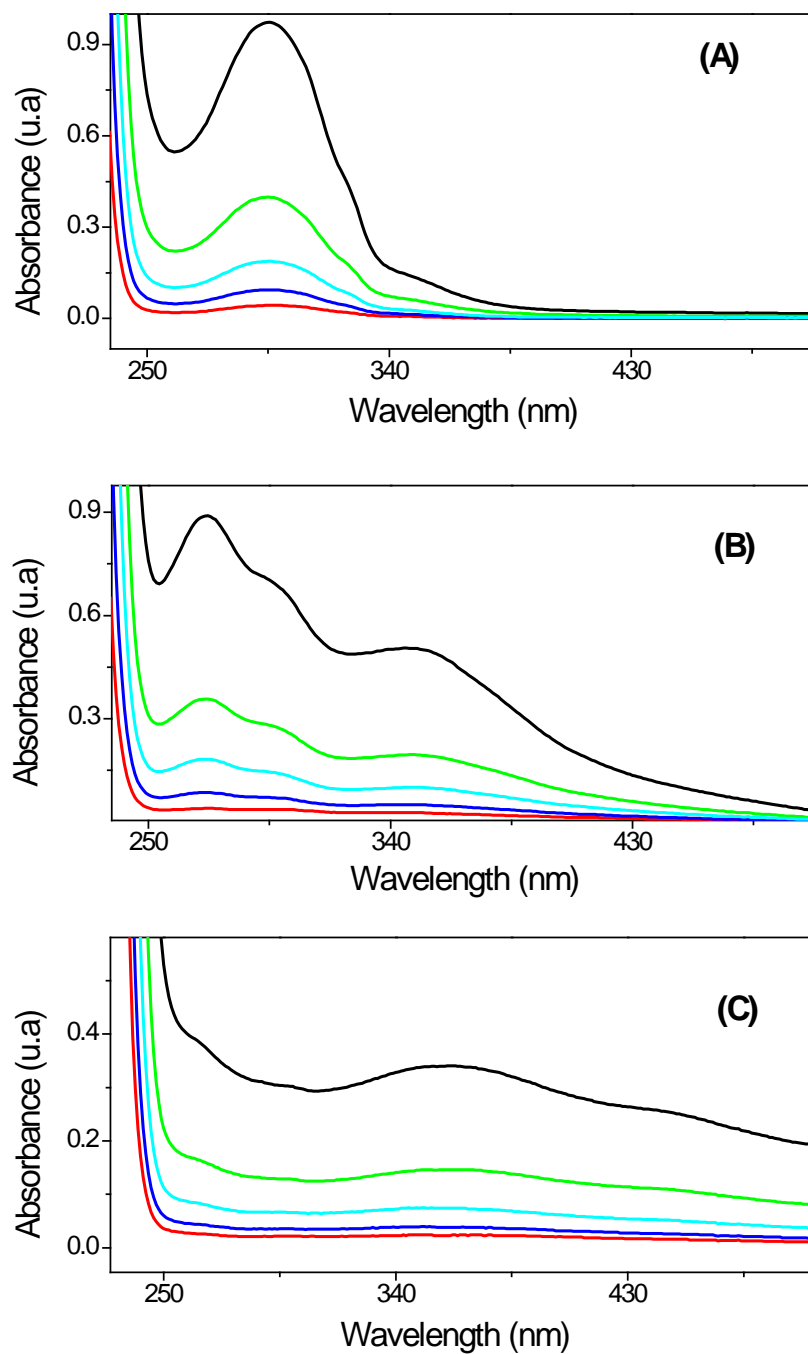

**Fig. S2** UV-visible absorption spectra of the dihydroxysalophen isomers (A) 3,4-DHS; (B) 2,5-DHS; (C) 2,3-DHS in aqueous solution at different concentrations:  $0.25 \times 10^{-5}$  M (black line);  $0.5 \times 10^{-5}$  M (green line);  $1 \times 10^{-5}$  M (magenta line);  $2 \times 10^{-5}$  M (blue line) and  $5 \times 10^{-5}$  M (red line).

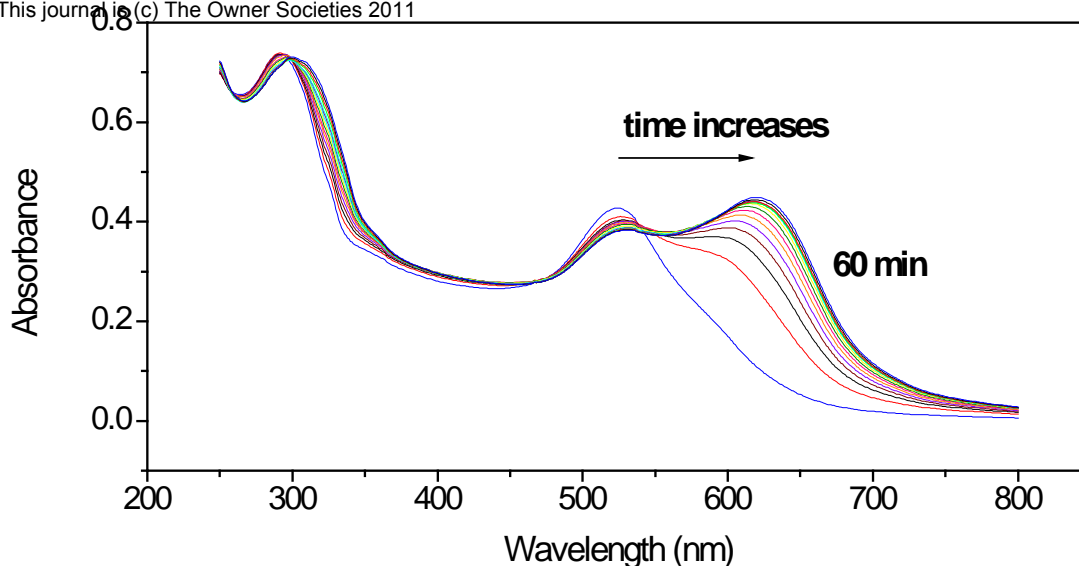

**Fig. S3** Kinetic of the interaction between the 3,4-DHS ( $2.0 \times 10^{-5}$  M) and citrate-AuNPs ( $1.8 \times 10^{-9}$  M) at pH 7.4 at the presence of 5 mM of tris(hydroxymethyl)aminomethane. UV-visible absorption spectra were recorded every 5 min in aqueous solution.

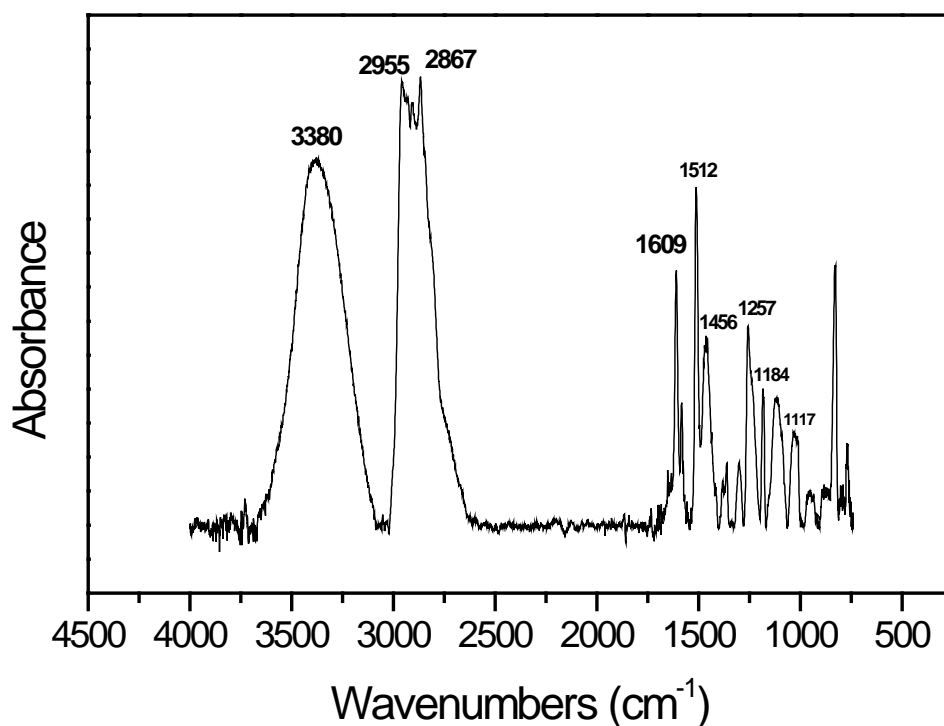

**Fig. S4** Absorbance FTIR spectrum of citrate-Au nanoparticles at pH 9.3. Nanoparticles were drop-cast on a  $\text{BaF}_2$  window and left to dry. Vibrations at 2955, 2867, 1609, 1512 and 1456 correspond to the vibrational modes  $\nu_{\text{asy}}(-\text{CH}_2)$ ,  $\nu_{\text{sym}}(-\text{CH}_2)$ ,  $\nu_{\text{asy}}(-\text{CO}_2^-)$ ,  $\nu_{\text{sym}}(-\text{CH}_2)$ ,  $\nu_{\text{sym}}(-\text{CO}_2^-)$ , respectively. The band at approximately 3380  $\text{cm}^{-1}$  correspond to the  $\nu(-\text{OH})$  vibration and the bands at 1257 and 1184  $\text{cm}^{-1}$  are correlated with  $\nu(-\text{CO})$ .

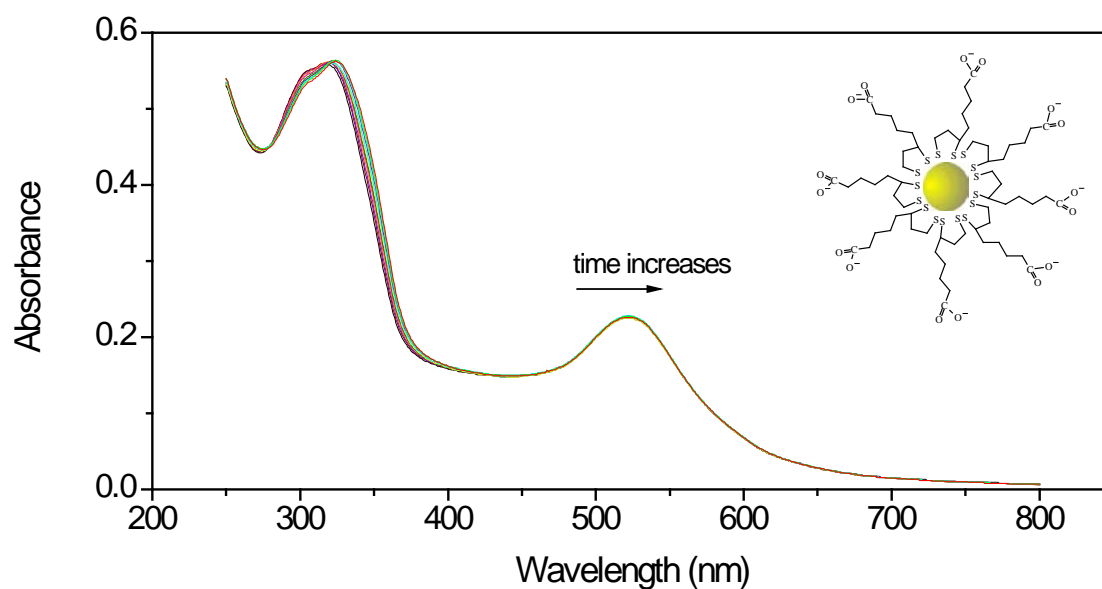

**Fig. S5** Kinetic of the interaction between the 3,4-DHS ( $2.0 \times 10^{-5}$  M) and thioctic-AuNPs ( $1.8 \times 10^{-9}$  M) at pH 9.3 in aqueous solution. UV-visible absorption spectra were recorded every 5 min in aqueous solution.

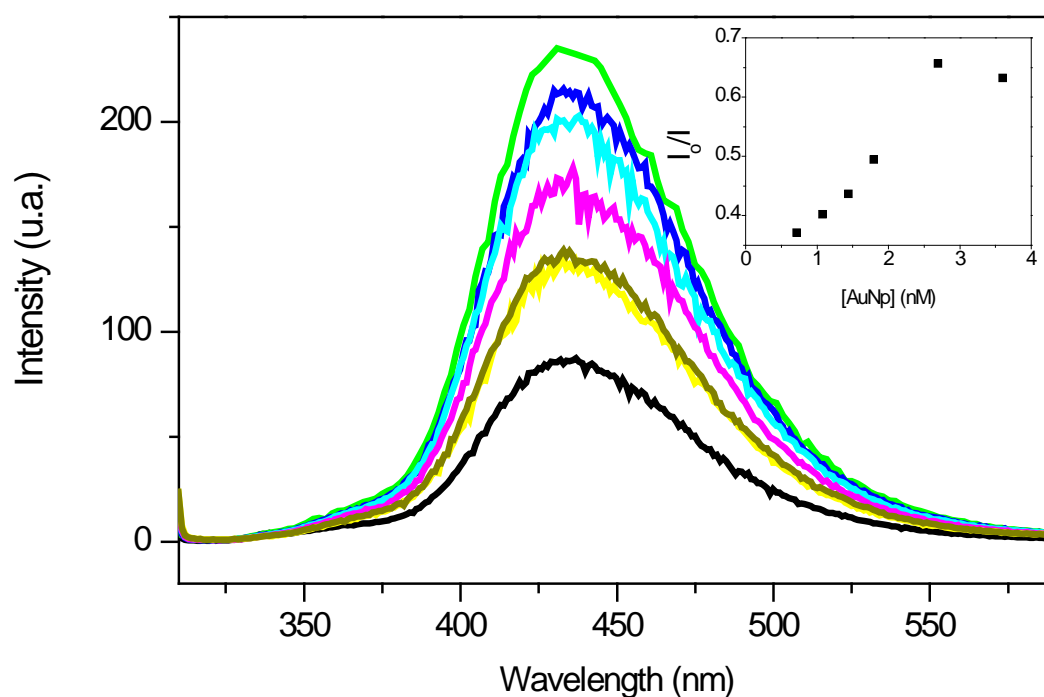

**Fig. S6** Emission spectra of 2,3-DHS ( $2.0 \times 10^{-5}$  M) in aqueous solution containing different concentrations of AuNPs. Inset: Stern-Volmer plot of 3,4-DHS with the increasing concentrations of AuNPs. [AuNPs]: 0.0 M (black line);  $7.2 \times 10^{-10}$  M (green line);  $1.1 \times 10^{-9}$  M (blue line);  $1.4 \times 10^{-9}$  M (magenta line);  $1.8 \times 10^{-9}$  M (cyan line);  $2.7 \times 10^{-9}$  M (yellow line);  $3.4 \times 10^{-9}$  M (brown line).

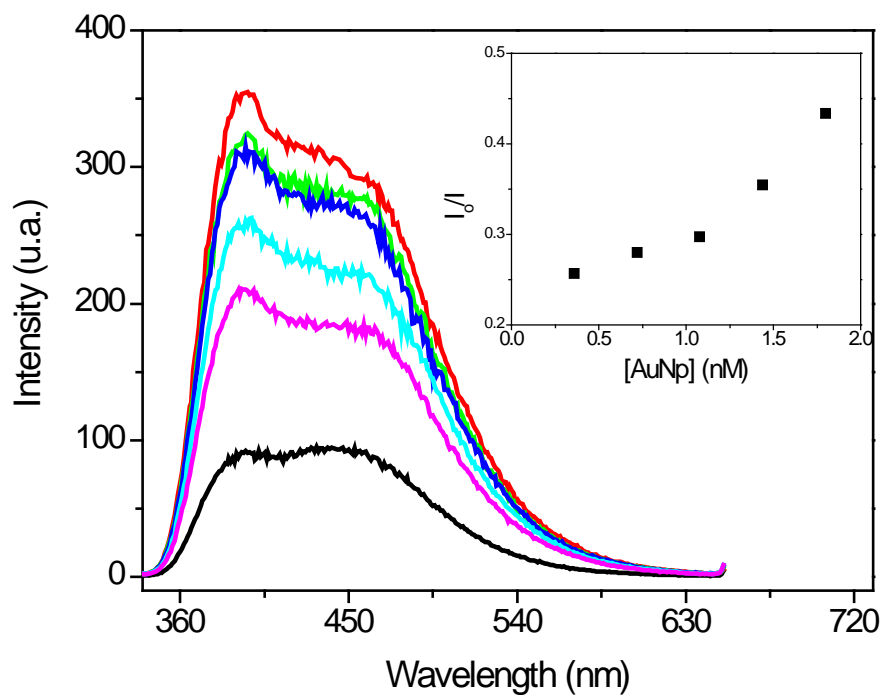

**Fig. S7** Emission spectra of 2,5-DHS ( $2.0 \times 10^{-5}$  M) in aqueous solution containing different concentrations of AuNPs. Inset: Stern-Volmer plot of 2,5-DHS with the increasing concentrations of AuNPs. [AuNPs]: 0.0 M (black line);  $7.2 \times 10^{-10}$  M (green line);  $1.1 \times 10^{-9}$  M (blue line);  $1.4 \times 10^{-9}$  M (magenta line);  $1.8 \times 10^{-9}$  M (cyan line).

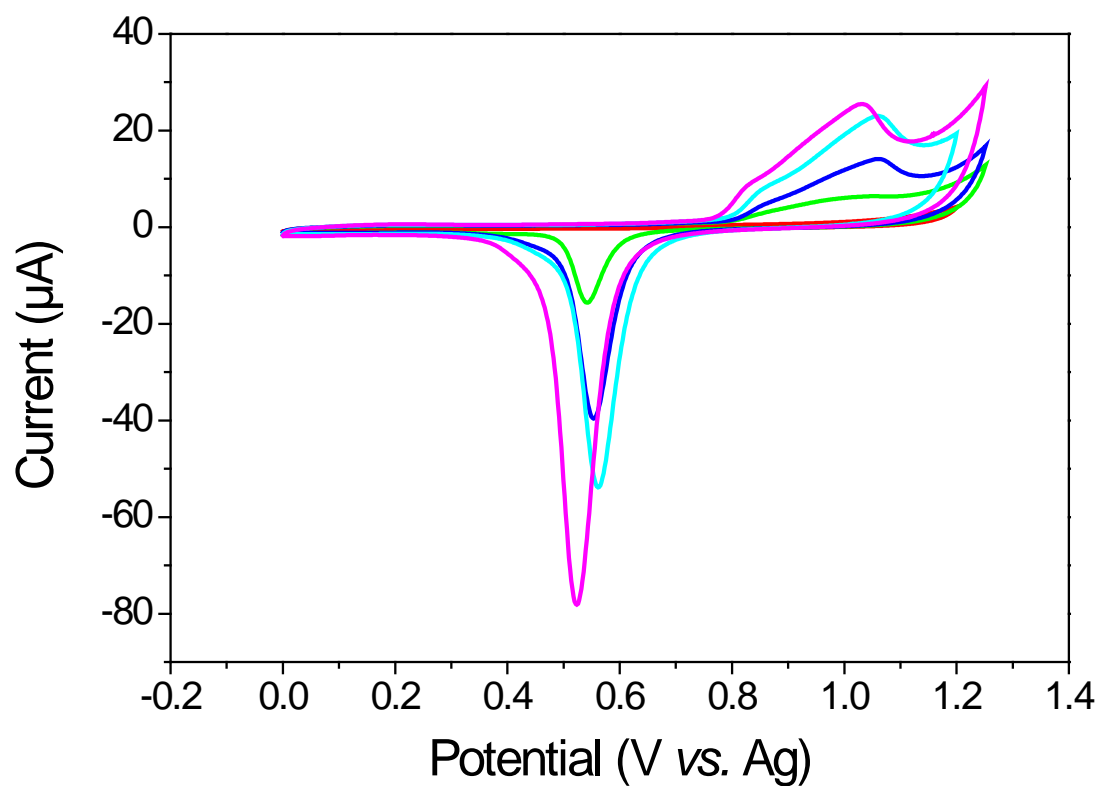

**Fig. S8** Cyclic voltammograms of carbon-screen printed electrodes in 0.1 M H<sub>2</sub>SO<sub>4</sub> before (red line) and after electrodeposition of citrate-AuNPs by application of a constant positive potential of +0.8 V during increasing periods of time: 15 min (green line); 30 min (blue line); 45 min (magenta line) and 60 min (cyan line). Measurements were carried out at a scan rate of 100 mV/s.

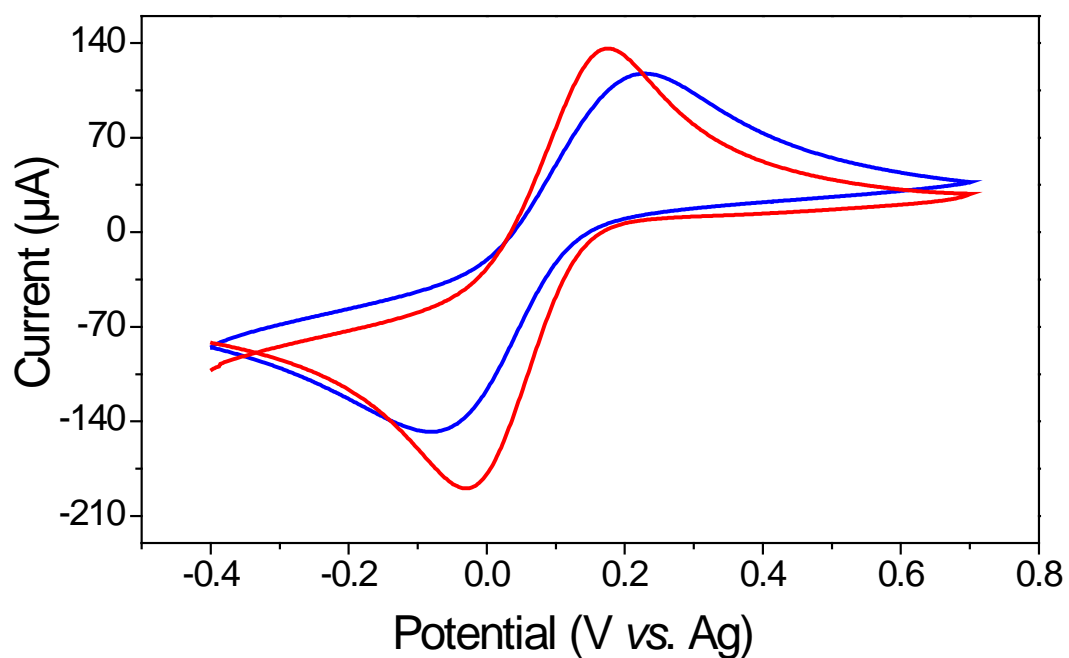

**Fig. S9** Cyclic voltammograms of carbon-screen printed electrodes in phosphate buffer solution (pH 7.0) containing 10mM  $[\text{Fe}(\text{CN})_6]^{3-}$  before (blue line) and after electrodeposition of citrate-AuNPs (red line) by application of a constant positive potential of +0.8 V during 60 min. Measurements were carried out at a scan rate of 100 mV/s.
